# Supplementary material for: How and Why Men and Women Differ in Their Microbiomes: Medical Ecology and Network Analyses of the Microgenderome
Source: PubMed Central journal article supplement (PMC6891928; doi:10.1002/advs.201902054), 2019-10-23
Supplement: ADVS-6-1902054-s002.pdf [file ADVS-6-1902054-s002.pdf]

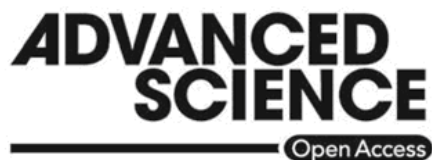

## Supporting Information

for *Adv. Sci.*, DOI: 10.1002/adv.201902054

How and Why Men and Women Differ in Their  
Microbiomes: Medical Ecology and Network Analyses of the  
Microgenderome

*Zhanshan (Sam) Ma\* and Wendy Li*

## Online Supplementary Information (OSI) for:

Ma ZS\* & Li W (2019) How and Why Men and Women Differ in Their Microbiomes: Medical Ecology and Network Analyses of the Microgenderome. *Advanced Science*.

The OSI includes three files (two PDF files A & B: “Microgenderome-OSI-File-A.pdf” & “Microgenderome-OSI-File-B.pdf”; one Excel file C “Microgenderome-OSI-File-C.xlsx”) available from the Wiley Online Library or from the author.

(A) Another PDF file “Microgenderome-OSI-File-A.pdf” contains the following information: Supplements to “Materials and Methods” Section (including the four algorithms for shared species, core/periphery, skeleton analyses and permutation tests); Supplements to “Diversity comparisons between both the sexes” (supported with Figs S1-S7).

(B) ***This*** PDF file “Microgenderome-OSI-File-B.pdf” contains the following OSI tables: Tables S1-1, S2-1, S2-2, S3-2, S4-2, S5-1, S5-2A, S5-2B, S5-3A, S5-3B, S5-4, S5-5, S6-1, S6-2, S6-3, S7-1, S7-2

(C) Excel file “Microgenderome-OSI-File-C.xlsx” contains the following OSI tables: Tables S1-2, S1-3, S2-3, S3-1, S4-1, S5-6, S6-4, S6-5

# 1. Sex differences in microbiome diversity with Hill numbers

**Table S1-1.** The *mean* and *standard error* of the community diversity (in the Hill numbers) for the male and female at each of the 15 microbiome sites, the results (*d*-statistic and *p*-value) of the effect-size test on diversity, as well as the results of Wilcoxon test (Note the highlighted cells in yellow contain tests with significant difference between both the sexes, with *p*-value < 0.05).

| Sample Sites         |                                  | Treatments                       | <i>q</i> =0                 | <i>q</i> =1 | <i>q</i> =2 | <i>q</i> =3 |        |
|----------------------|----------------------------------|----------------------------------|-----------------------------|-------------|-------------|-------------|--------|
| Airway               | Anterior nares                   | Male                             | Mean                        | 791.247     | 192.705     | 63.363      | 38.113 |
|                      |                                  |                                  | Std. Err.                   | 46.420      | 13.370      | 7.260       | 4.816  |
|                      |                                  | Female                           | Mean                        | 707.056     | 144.693     | 39.356      | 23.084 |
|                      |                                  |                                  | Std. Err.                   | 48.957      | 12.332      | 4.110       | 2.347  |
|                      |                                  | Male vs. Female                  | Cohen's <i>d</i>            | 0.270       | 0.440       | 0.490       | 0.490  |
|                      |                                  |                                  | <i>p</i> -value of <i>d</i> | 0.100       | 0.010       | 0.000       | 0.000  |
|                      | <i>p</i> -value of Wilcoxon test | 0.420                            | 0.015                       | 0.008       | 0.007       |             |        |
| Gut                  | Stool                            | Male                             | Mean                        | 661.337     | 152.585     | 53.187      | 33.328 |
|                      |                                  |                                  | Std. Err.                   | 30.316      | 6.990       | 2.996       | 1.988  |
|                      |                                  | Female                           | Mean                        | 599.033     | 136.333     | 48.516      | 30.742 |
|                      |                                  |                                  | Std. Err.                   | 34.277      | 7.193       | 3.190       | 2.128  |
|                      |                                  | Male vs. Female                  | Cohen's <i>d</i>            | 0.240       | 0.250       | 0.180       | 0.160  |
|                      |                                  |                                  | <i>p</i> -value of <i>d</i> | 0.100       | 0.090       | 0.220       | 0.280  |
|                      | <i>p</i> -value of Wilcoxon test | 0.094                            | 0.106                       | 0.146       | 0.180       |             |        |
| Oral                 | Attached Keratinized gingiva     | Male                             | Mean                        | 637.404     | 116.270     | 37.720      | 24.073 |
|                      |                                  |                                  | Std. Err.                   | 29.942      | 5.977       | 2.458       | 1.544  |
|                      |                                  | Female                           | Mean                        | 607.310     | 120.597     | 40.477      | 25.633 |
|                      |                                  |                                  | Std. Err.                   | 25.272      | 8.615       | 3.548       | 2.066  |
|                      |                                  | Male vs. Female                  | Cohen's <i>d</i>            | 0.070       | -0.010      | -0.040      | -0.040 |
|                      |                                  |                                  | <i>p</i> -value of <i>d</i> | 0.640       | 0.930       | 0.800       | 0.790  |
|                      |                                  | <i>p</i> -value of Wilcoxon test | 0.606                       | 0.760       | 0.861       | 0.879       |        |
|                      | Buccal mucosa                    | Male                             | Mean                        | 848.421     | 188.261     | 50.894      | 29.313 |
|                      |                                  |                                  | Std. Err.                   | 37.739      | 10.274      | 3.785       | 2.123  |
|                      |                                  | Female                           | Mean                        | 855.670     | 203.332     | 62.383      | 36.262 |
|                      |                                  |                                  | Std. Err.                   | 43.534      | 13.332      | 5.967       | 3.379  |
|                      |                                  | Male vs. Female                  | Cohen's <i>d</i>            | -0.040      | -0.100      | -0.180      | -0.200 |
|                      |                                  | <i>p</i> -value of <i>d</i>      | 0.810                       | 0.510       | 0.220       | 0.180       |        |
|                      | <i>p</i> -value of Wilcoxon test | 0.774                            | 0.807                       | 0.579       | 0.460       |             |        |
| Hard palate          | Male                             | Mean                             | 972.337                     | 269.741     | 89.684      | 52.913      |        |
|                      |                                  | Std. Err.                        | 49.559                      | 11.832      | 6.375       | 4.108       |        |
|                      | Female                           | Mean                             | 891.674                     | 260.545     | 88.785      | 52.288      |        |
|                      |                                  | Std. Err.                        | 40.595                      | 13.549      | 6.872       | 4.252       |        |
|                      | Male vs. Female                  | Cohen's <i>d</i>                 | 0.200                       | 0.130       | 0.040       | 0.030       |        |
|                      |                                  | <i>p</i> -value of <i>d</i>      | 0.190                       | 0.390       | 0.770       | 0.820       |        |
|                      | <i>p</i> -value of Wilcoxon test | 0.513                            | 0.739                       | 0.812       | 0.856       |             |        |
| Palatine Tonsils     | Male                             | Mean                             | 984.628                     | 264.770     | 84.628      | 48.938      |        |
|                      |                                  | Std. Err.                        | 45.051                      | 9.764       | 4.449       | 2.756       |        |
|                      | Female                           | Mean                             | 906.228                     | 290.104     | 105.822     | 62.563      |        |
|                      |                                  | Std. Err.                        | 34.367                      | 11.384      | 5.796       | 3.627       |        |
|                      | Male vs. Female                  | Cohen's <i>d</i>                 | 0.160                       | -0.210      | -0.380      | -0.400      |        |
|                      |                                  | <i>p</i> -value of <i>d</i>      | 0.280                       | 0.150       | 0.010       | 0.010       |        |
|                      | <i>p</i> -value of Wilcoxon test | 0.162                            | 0.136                       | 0.009       | 0.009       |             |        |
| Saliva               | Male                             | Mean                             | 899.506                     | 300.680     | 114.191     | 68.591      |        |
|                      |                                  | Std. Err.                        | 47.240                      | 13.761      | 6.448       | 4.186       |        |
|                      | Female                           | Mean                             | 992.920                     | 347.047     | 128.923     | 75.974      |        |
|                      |                                  | Std. Err.                        | 51.722                      | 15.991      | 8.028       | 5.504       |        |
|                      | Male vs. Female                  | Cohen's <i>d</i>                 | -0.220                      | -0.330      | -0.200      | -0.140      |        |
|                      |                                  | <i>p</i> -value of <i>d</i>      | 0.160                       | 0.040       | 0.200       | 0.380       |        |
|                      | <i>p</i> -value of Wilcoxon test | 0.176                            | 0.037                       | 0.192       | 0.428       |             |        |
| Subgingival plaque   | Male                             | Mean                             | 931.821                     | 275.532     | 97.438      | 58.112      |        |
|                      |                                  | Std. Err.                        | 40.856                      | 10.769      | 4.933       | 3.205       |        |
|                      | Female                           | Mean                             | 917.034                     | 285.208     | 105.553     | 62.994      |        |
|                      |                                  | Std. Err.                        | 40.154                      | 11.758      | 5.542       | 3.396       |        |
|                      | Male vs. Female                  | Cohen's <i>d</i>                 | 0.020                       | -0.090      | -0.160      | -0.160      |        |
|                      |                                  | <i>p</i> -value of <i>d</i>      | 0.870                       | 0.530       | 0.280       | 0.270       |        |
|                      | <i>p</i> -value of Wilcoxon test | 0.822                            | 0.760                       | 0.352       | 0.288       |             |        |
| Supragingival plaque | Male                             | Mean                             | 935.646                     | 258.314     | 89.334      | 53.291      |        |
|                      |                                  | Std. Err.                        | 42.681                      | 12.132      | 5.555       | 3.489       |        |
|                      | Female                           | Mean                             | 918.935                     | 285.018     | 105.783     | 64.008      |        |
|                      |                                  | Std. Err.                        | 40.363                      | 13.318      | 6.597       | 4.252       |        |
|                      | Male vs. Female                  | Cohen's <i>d</i>                 | 0.040                       | -0.200      | -0.260      | -0.260      |        |
|                      |                                  | <i>p</i> -value of <i>d</i>      | 0.790                       | 0.180       | 0.080       | 0.070       |        |
|                      | <i>p</i> -value of Wilcoxon test | 0.872                            | 0.107                       | 0.050       | 0.050       |             |        |
| Throat               | Male                             | Mean                             | 898.899                     | 287.803     | 100.857     | 58.583      |        |

|  |                 |                                  |         |         |         |        |
|--|-----------------|----------------------------------|---------|---------|---------|--------|
|  |                 | Std. Err.                        | 42.334  | 10.880  | 5.164   | 3.302  |
|  | Female          | Mean                             | 927.864 | 290.503 | 107.328 | 64.534 |
|  |                 | Std. Err.                        | 39.993  | 10.531  | 5.696   | 3.819  |
|  | Male vs. Female | Cohen's <i>d</i>                 | -0.100  | -0.070  | -0.130  | -0.180 |
|  |                 | <i>p</i> -value of <i>d</i>      | 0.500   | 0.660   | 0.400   | 0.260  |
|  |                 | <i>p</i> -value of Wilcoxon test | 0.532   | 0.842   | 0.463   | 0.323  |
|  | Male            | Mean                             | 981.357 | 279.823 | 93.665  | 54.699 |
|  |                 | Std. Err.                        | 46.183  | 9.113   | 4.211   | 2.785  |
|  | Female          | Mean                             | 967.772 | 291.934 | 103.059 | 61.085 |
|  |                 | Std. Err.                        | 40.664  | 10.498  | 4.848   | 3.170  |
|  | Male vs. Female | Cohen's <i>d</i>                 | 0.020   | -0.100  | -0.190  | -0.210 |
|  |                 | <i>p</i> -value of <i>d</i>      | 0.890   | 0.500   | 0.190   | 0.150  |
|  |                 | <i>p</i> -value of Wilcoxon test | 0.967   | 0.261   | 0.167   | 0.167  |
|  |                 | Mean                             | 672.728 | 161.022 | 52.961  | 31.247 |
|  | Male            | Std. Err.                        | 53.874  | 16.325  | 7.681   | 4.519  |
|  | Female          | Mean                             | 441.219 | 114.574 | 37.108  | 22.518 |
|  |                 | Std. Err.                        | 52.941  | 14.639  | 4.819   | 2.725  |
|  | Male vs. Female | Cohen's <i>d</i>                 | 0.550   | 0.370   | 0.250   | 0.220  |
|  |                 | <i>p</i> -value of <i>d</i>      | 0.000   | 0.030   | 0.140   | 0.190  |
|  |                 | <i>p</i> -value of Wilcoxon test | 0.000   | 0.020   | 0.336   | 0.460  |
|  | Male            | Mean                             | 671.779 | 164.105 | 56.637  | 34.485 |
|  |                 | Std. Err.                        | 51.930  | 17.629  | 8.428   | 5.103  |
|  | Female          | Mean                             | 443.710 | 116.699 | 37.888  | 22.952 |
|  |                 | Std. Err.                        | 47.734  | 14.697  | 5.235   | 3.094  |
|  | Male vs. Female | Cohen's <i>d</i>                 | 0.540   | 0.390   | 0.310   | 0.310  |
|  |                 | <i>p</i> -value of <i>d</i>      | 0.000   | 0.020   | 0.070   | 0.070  |
|  |                 | <i>p</i> -value of Wilcoxon test | 0.001   | 0.022   | 0.124   | 0.135  |
|  | Male            | Mean                             | 902.526 | 180.701 | 53.707  | 31.102 |
|  |                 | Std. Err.                        | 59.080  | 13.789  | 5.768   | 3.385  |
|  | Female          | Mean                             | 765.831 | 118.538 | 28.898  | 17.276 |
|  |                 | Std. Err.                        | 52.119  | 10.366  | 3.361   | 1.939  |
|  | Male vs. Female | Cohen's <i>d</i>                 | 0.330   | 0.520   | 0.560   | 0.530  |
|  |                 | <i>p</i> -value of <i>d</i>      | 0.030   | 0.000   | 0.000   | 0.000  |
|  |                 | <i>p</i> -value of Wilcoxon test | 0.029   | 0.001   | 0.001   | 0.002  |
|  | Male            | Mean                             | 884.714 | 165.505 | 47.293  | 27.507 |
|  |                 | Std. Err.                        | 49.250  | 11.778  | 4.947   | 2.883  |
|  | Female          | Mean                             | 653.933 | 109.031 | 28.140  | 16.839 |
|  |                 | Std. Err.                        | 42.083  | 10.304  | 3.307   | 1.922  |
|  | Male vs. Female | Cohen's <i>d</i>                 | 0.610   | 0.550   | 0.480   | 0.460  |
|  |                 | <i>p</i> -value of <i>d</i>      | 0.000   | 0.000   | 0.000   | 0.000  |
|  |                 | <i>p</i> -value of Wilcoxon test | 0.000   | 0.000   | 0.002   | 0.004  |

**Table S1-2.** The *mean* and *standard error* of the species diversity (in the Hill numbers) of 5 main phyla for the male and female at each of the 15 microbiome sites, the results (*d*-statistic and *p*-value) of the effect-size test on diversity, as well as the results of Wilcoxon test (Note the highlighted cells in yellow contain tests with significant difference between both the sexes, with *p*-value < 0.05). (This table was listed in Excel File: Microgenderome-OSI-File-C.xlsx)

**Table S1-3.** The *mean* and *standard error* of the species diversity (in the Hill numbers) of the core and periphery OTUs for the male and female at each of the 15 microbiome sites, the results (*d*-statistic and *p*-value) of the effect-size test on diversity, as well as the results of Wilcoxon test (Note the highlighted cells in yellow contain tests with significant difference between both the sexes, with *p*-value < 0.05). (This table was listed in Excel File: Microgenderome-OSI-File-C.xlsx)

## 2. Share species analysis between the male and female

**Table S2-1.** The results of shared species between the male and female at each of the 15 microbiome sites

| Sample Sites |                              | Observed shared OTUs | Algorithm A1         |         | Algorithm A2    |                      |         |                 |
|--------------|------------------------------|----------------------|----------------------|---------|-----------------|----------------------|---------|-----------------|
|              |                              |                      | Expected shared OTUs | O/E (%) | <i>p</i> -value | Expected shared OTUs | O/E (%) | <i>p</i> -value |
| Airway       | Anterior nares               | 8324                 | 9838.246             | 84.61   | <0.001          | 8528.463             | 97.60   | 0.046           |
| Gut          | Stool                        | 5806                 | 7193.979             | 80.71   | <0.001          | 6017.248             | 96.49   | <0.001          |
| Oral         | Attached Keratinized gingiva | 6802                 | 7686.89              | 88.49   | <0.001          | 6833.195             | 99.54   | 0.235           |
|              | Buccal mucosa                | 9040                 | 9818.42              | 92.07   | <0.001          | 9061.358             | 99.76   | 0.314           |
|              | Hard palate                  | 9372                 | 10291.769            | 91.06   | <0.001          | 9454.56              | 99.13   | 0.063           |
|              | Palatine Tonsils             | 10240                | 11188.39             | 91.52   | <0.001          | 10291.242            | 99.50   | 0.170           |
|              | Saliva                       | 9516                 | 10271.771            | 92.64   | <0.001          | 9446.889             | 100.73  | 0.903           |
|              | Subgingival plaque           | 9116                 | 9967.392             | 91.46   | <0.001          | 9134.805             | 99.79   | 0.329           |
|              | Supragingival plaque         | 8665                 | 9307.136             | 93.10   | <0.001          | 8705.056             | 99.54   | 0.142           |
|              | Throat                       | 9596                 | 11002.101            | 87.22   | <0.001          | 9622.037             | 99.73   | 0.325           |
|              | Tongue dorsum                | 8374                 | 8967.636             | 93.38   | <0.001          | 8437.485             | 99.25   | 0.060           |
| Skin         | Left Antecubital fossa       | 7476                 | 9927.947             | 75.30   | <0.001          | 8121.658             | 92.05   | 0.001           |
|              | Right Antecubital fossa      | 7632                 | 9930.257             | 76.86   | <0.001          | 8007.177             | 95.31   | 0.008           |
|              | Left Retroauricular crease   | 10113                | 11722.291            | 86.27   | <0.001          | 10366.36             | 97.56   | 0.03            |
|              | Right Retroauricular crease  | 9159                 | 11052.915            | 82.87   | <0.001          | 9606.09              | 95.35   | 0.002           |

**Table S2-2.** The results of shared species of 5 main phyla between the male and female at each of the 15 microbiome sites

| <i>Actinobacteria</i> |                              |                      |                      |         |                 |                      |         |                 |
|-----------------------|------------------------------|----------------------|----------------------|---------|-----------------|----------------------|---------|-----------------|
| Sample Sites          |                              | Observed shared OTUs | Algorithm A1         |         | Algorithm A2    |                      |         |                 |
|                       |                              |                      | Expected shared OTUs | O/E (%) | <i>p</i> -value | Expected shared OTUs | O/E (%) | <i>p</i> -value |
| Airway                | Anterior nares               | 5382                 | 5765.062             | 93.36   | <0.001          | 5532.263             | 97.28   | 0.049           |
| Gut                   | Stool                        | 28                   | 32.757               | 85.48   | 0.015           | 26.840               | 104.32  | 0.796           |
| Oral                  | Attached Keratinized gingiva | 843                  | 1037.582             | 81.25   | <0.001          | 853.807              | 98.73   | 0.281           |
|                       | Buccal mucosa                | 1659                 | 1772.427             | 93.60   | <0.001          | 1642.684             | 100.99  | 0.777           |
|                       | Hard palate                  | 2241                 | 2452.343             | 91.38   | <0.001          | 2269.059             | 98.76   | 0.109           |
|                       | Palatine Tonsils             | 2244                 | 2451.098             | 91.55   | <0.001          | 2223.934             | 100.90  | 0.804           |
|                       | Saliva                       | 1760                 | 1939.827             | 90.73   | <0.001          | 1748.734             | 100.64  | 0.672           |
|                       | Subgingival plaque           | 2127                 | 2315.607             | 91.85   | <0.001          | 2113.833             | 100.62  | 0.780           |
|                       | Supragingival plaque         | 2149                 | 2313.080             | 92.91   | <0.001          | 2174.375             | 98.83   | 0.038           |
|                       | Throat                       | 2407                 | 2700.811             | 89.12   | <0.001          | 2391.171             | 100.66  | 0.686           |
|                       | Tongue dorsum                | 2497                 | 2630.157             | 94.94   | <0.001          | 2511.228             | 99.43   | 0.186           |
| Skin                  | Left Antecubital fossa       | 4156                 | 4804.601             | 86.50   | <0.001          | 4789.696             | 86.77   | <0.001          |
|                       | Right Antecubital fossa      | 4493                 | 5042.368             | 89.10   | <0.001          | 4906.846             | 91.57   | <0.001          |
|                       | Left Retroauricular crease   | 7548                 | 8039.303             | 93.89   | <0.001          | 7753.422             | 97.35   | 0.033           |
|                       | Right Retroauricular crease  | 6989                 | 7518.566             | 92.96   | <0.001          | 7368.900             | 94.84   | 0.003           |
| <i>Bacteroidetes</i>  |                              |                      |                      |         |                 |                      |         |                 |
| Sample Sites          |                              | Observed shared OTUs | Algorithm A1         |         | Algorithm A2    |                      |         |                 |
|                       |                              |                      | Expected shared OTUs | O/E (%) | <i>p</i> -value | Expected shared OTUs | O/E (%) | <i>p</i> -value |
| Airway                | Anterior nares               | 589                  | 892.128              | 66.02   | <0.001          | 588.017              | 100.17  | 0.489           |
| Gut                   | Stool                        | 2020                 | 2584.017             | 78.17   | <0.001          | 2140.717             | 94.36   | <0.001          |
| Oral                  | Attached Keratinized gingiva | 1279                 | 1501.036             | 85.21   | <0.001          | 1294.023             | 98.84   | 0.198           |
|                       | Buccal mucosa                | 1767                 | 1947.996             | 90.71   | <0.001          | 1765.356             | 100.09  | 0.525           |

|      |                             |      |          |       |        |          |        |       |
|------|-----------------------------|------|----------|-------|--------|----------|--------|-------|
|      | Hard palate                 | 1720 | 1985.719 | 86.62 | <0.001 | 1744.536 | 98.59  | 0.109 |
|      | Palatine Tonsils            | 2373 | 2633.645 | 90.10 | <0.001 | 2369.685 | 100.14 | 0.572 |
|      | Saliva                      | 2393 | 2614.444 | 91.53 | <0.001 | 2386.040 | 100.29 | 0.628 |
|      | Subgingival plaque          | 2355 | 2587.205 | 91.02 | <0.001 | 2381.859 | 98.87  | 0.075 |
|      | Supragingival plaque        | 2068 | 2253.566 | 91.77 | <0.001 | 2080.072 | 99.42  | 0.212 |
|      | Throat                      | 1987 | 2372.735 | 83.74 | <0.001 | 2011.827 | 98.77  | 0.170 |
|      | Tongue dorsum               | 1726 | 1877.442 | 91.93 | <0.001 | 1737.669 | 99.33  | 0.233 |
| Skin | Left Antecubital fossa      | 710  | 1206.133 | 58.87 | <0.001 | 721.785  | 98.37  | 0.298 |
|      | Right Antecubital fossa     | 690  | 1089.308 | 63.34 | <0.001 | 669.886  | 103.00 | 0.803 |
|      | Left Retroauricular crease  | 498  | 756.347  | 65.84 | <0.001 | 501.822  | 99.24  | 0.409 |
|      | Right Retroauricular crease | 389  | 696.801  | 55.83 | <0.001 | 392.358  | 99.14  | 0.421 |

***Firmicutes***

| Sample Sites |                              | Observed shared OTUs | Algorithm A1         |         |                 | Algorithm A2         |         |                 |
|--------------|------------------------------|----------------------|----------------------|---------|-----------------|----------------------|---------|-----------------|
|              |                              |                      | Expected shared OTUs | O/E (%) | <i>p</i> -value | Expected shared OTUs | O/E (%) | <i>p</i> -value |
| Airway       | Anterior nares               | 1805                 | 2259.358             | 79.89   | <0.001          | 1837.939             | 98.21   | 0.125           |
| Gut          | Stool                        | 3255                 | 3846.363             | 84.63   | <0.001          | 3339.313             | 97.48   | 0.003           |
| Oral         | Attached Keratinized gingiva | 3096                 | 3293.623             | 94.00   | <0.001          | 3094.164             | 100.06  | 0.540           |
|              | Buccal mucosa                | 3659                 | 3889.352             | 94.08   | <0.001          | 3685.251             | 99.29   | 0.111           |
|              | Hard palate                  | 3619                 | 3837.308             | 94.31   | <0.001          | 3608.788             | 100.28  | 0.680           |
|              | Palatine Tonsils             | 3437                 | 3672.194             | 93.60   | <0.001          | 3472.145             | 98.99   | 0.089           |
|              | Saliva                       | 2922                 | 3087.149             | 94.65   | <0.001          | 2890.844             | 101.08  | 0.954           |
|              | Subgingival plaque           | 2402                 | 2599.271             | 92.41   | <0.001          | 2389.725             | 100.51  | 0.717           |
|              | Supragingival plaque         | 2257                 | 2382.720             | 94.72   | <0.001          | 2252.510             | 100.20  | 0.631           |
|              | Throat                       | 3252                 | 3663.184             | 88.78   | <0.001          | 3237.996             | 100.43  | 0.677           |
| Skin         | Tongue dorsum                | 2408                 | 2545.885             | 94.58   | <0.001          | 2414.642             | 99.72   | 0.334           |
|              | Left Antecubital fossa       | 1898                 | 2547.651             | 74.50   | <0.001          | 1895.926             | 100.11  | 0.472           |
|              | Right Antecubital fossa      | 1771                 | 2387.140             | 74.19   | <0.001          | 1772.871             | 99.89   | 0.436           |
|              | Left Retroauricular crease   | 1626                 | 2095.877             | 77.58   | <0.001          | 1643.667             | 98.93   | 0.236           |
|              | Right Retroauricular crease  | 1411                 | 1857.586             | 75.96   | <0.001          | 1449.949             | 97.31   | 0.086           |

***Fusobacteria***

| Sample Sites |                              | Observed shared OTUs | Algorithm A1         |         |                 | Algorithm A2         |         |                 |
|--------------|------------------------------|----------------------|----------------------|---------|-----------------|----------------------|---------|-----------------|
|              |                              |                      | Expected shared OTUs | O/E (%) | <i>p</i> -value | Expected shared OTUs | O/E (%) | <i>p</i> -value |
| Airway       | Anterior nares               | 57                   | 84.697               | 67.30   | <0.001          | 61.271               | 93.03   | 0.222           |
| Gut          | Stool                        | 2                    | 4.522                | 44.23   | 0.039           | -                    | -       | -               |
| Oral         | Attached Keratinized gingiva | 327                  | 370.542              | 88.25   | <0.001          | 318.838              | 102.56  | 0.843           |
|              | Buccal mucosa                | 462                  | 491.775              | 93.95   | <0.001          | 454.751              | 101.59  | 0.854           |
|              | Hard palate                  | 388                  | 444.407              | 87.31   | <0.001          | 401.597              | 96.61   | 0.048           |
|              | Palatine Tonsils             | 632                  | 683.097              | 92.52   | <0.001          | 633.353              | 99.79   | 0.448           |
|              | Saliva                       | 519                  | 546.095              | 95.04   | <0.001          | 512.452              | 101.28  | 0.788           |
|              | Subgingival plaque           | 690                  | 722.142              | 95.55   | <0.001          | 682.383              | 101.12  | 0.848           |
|              | Supragingival plaque         | 631                  | 673.184              | 93.73   | <0.001          | 640.385              | 98.53   | 0.113           |
|              | Throat                       | 498                  | 549.266              | 90.67   | <0.001          | 507.123              | 98.20   | 0.118           |
| Skin         | Tongue dorsum                | 438                  | 495.559              | 88.39   | <0.001          | 457.431              | 95.75   | 0.010           |
|              | Left Antecubital fossa       | 90                   | 141.455              | 63.62   | <0.001          | 89.137               | 100.97  | 0.529           |
|              | Right Antecubital fossa      | 65                   | 107.056              | 60.72   | <0.001          | 66.774               | 97.34   | 0.394           |
|              | Left Retroauricular crease   | 56                   | 96.274               | 58.17   | <0.001          | 76.107               | 73.58   | 0.017           |
|              | Right Retroauricular crease  | 48                   | 75.525               | 63.56   | <0.001          | 45.328               | 105.89  | 0.703           |

***Proteobacteria***

| Sample Sites |                | Observed shared OTUs | Algorithm A1         |         |                 | Algorithm A2         |         |                 |
|--------------|----------------|----------------------|----------------------|---------|-----------------|----------------------|---------|-----------------|
|              |                |                      | Expected shared OTUs | O/E (%) | <i>p</i> -value | Expected shared OTUs | O/E (%) | <i>p</i> -value |
| Airway       | Anterior nares | 412                  | 571.077              | 72.14   | <0.001          | 414.495              | 99.40   | 0.417           |
| Gut          | Stool          | 194                  | 242.133              | 80.12   | <0.001          | 186.580              | 103.98  | 0.928           |

|      |                              |      |          |       |        |          |        |       |
|------|------------------------------|------|----------|-------|--------|----------|--------|-------|
|      | Attached Keratinized gingiva | 1144 | 1243.540 | 92.00 | <0.001 | 1160.327 | 98.59  | 0.134 |
|      | Buccal mucosa                | 1252 | 1358.998 | 92.13 | <0.001 | 1269.678 | 98.61  | 0.096 |
|      | Hard palate                  | 1139 | 1263.493 | 90.15 | <0.001 | 1166.884 | 97.61  | 0.027 |
|      | Palatine Tonsils             | 1116 | 1236.928 | 90.22 | <0.001 | 1136.330 | 98.21  | 0.086 |
| Oral | Saliva                       | 1392 | 1496.306 | 93.03 | <0.001 | 1380.046 | 100.87 | 0.785 |
|      | Subgingival plaque           | 1010 | 1135.579 | 88.94 | <0.001 | 1035.139 | 97.57  | 0.020 |
|      | Supragingival plaque         | 1100 | 1166.435 | 94.30 | <0.001 | 1102.189 | 99.80  | 0.421 |
|      | Throat                       | 1098 | 1262.996 | 86.94 | <0.001 | 1111.480 | 98.79  | 0.212 |
|      | Tongue dorsum                | 966  | 1044.546 | 92.48 | <0.001 | 977.933  | 98.78  | 0.138 |
|      | Left Antecubital fossa       | 486  | 720.529  | 67.45 | <0.001 | 488.051  | 99.58  | 0.422 |
|      | Right Antecubital fossa      | 475  | 699.964  | 67.86 | <0.001 | 471.310  | 100.78 | 0.611 |
| Skin | Left Retroauricular crease   | 312  | 477.992  | 65.27 | <0.001 | 321.584  | 97.02  | 0.175 |
|      | Right Retroauricular crease  | 279  | 482.396  | 57.84 | <0.001 | 301.072  | 92.67  | 0.036 |

**Table S2-3.** The shared and sex-specific OTUs between the male and female at each of the 15 microbiome sites (*This table was listed in Excel File: Microgenderome-OSI-File-C.xlsx*)

### 3. Sex difference in the inter-individual heterogeneity based on the extended power law

**Table S3-1.** The parameters of Type-I power law extension (PLE-I) for community spatial heterogeneity and Type-III power law extension (PLE-III) for mixed-species population spatial aggregation (*This table was listed in Excel File: Microgenderome-OSI-File-C.xlsx*)

**Table S3-2.** The *p*-values of permutation tests for the PLE parameters between the male and female at each of the 15 microbiome sites

| Sample site |                             | Type-I PLE |          | Type-III PLE |          |
|-------------|-----------------------------|------------|----------|--------------|----------|
|             |                             | <i>b</i>   | $\ln(a)$ | <i>b</i>     | $\ln(a)$ |
| Airway      | Anterior nares              | 0.983      | 0.909    | 0.094        | 0.112    |
| Gut         | Stool                       | 0.731      | 0.117    | 0.096        | 0.033    |
| Oral        | Keratinized gingiva         | 0.160      | 0.272    | 0.888        | 0.884    |
|             | Buccal mucosa               | 0.035      | 0.031    | 0.404        | 0.308    |
|             | Hard palate                 | 0.812      | 0.807    | 0.733        | 0.711    |
|             | Palatine tonsils            | 0.441      | 0.702    | 0.806        | 0.705    |
|             | Saliva                      | 0.647      | 0.724    | 0.991        | 0.991    |
|             | Subgingival plaque          | 0.360      | 0.587    | 0.227        | 0.194    |
|             | Supragingival plaque        | 0.781      | 0.977    | 0.917        | 0.945    |
|             | Throat                      | 0.621      | 0.753    | 0.497        | 0.460    |
|             | Tongue dorsum               | 0.326      | 0.744    | 0.841        | 0.779    |
| Skin        | Left antecubital fossa      | 0.856      | 0.831    | 0.006        | 0.005    |
|             | Right antecubital fossa     | 0.794      | 0.618    | 0.013        | 0.005    |
|             | Left retroauricular crease  | 0.999      | 0.882    | 0.507        | 0.509    |
|             | Right retroauricular crease | 1.000      | 0.935    | 0.009        | 0.004    |



#### 4. Sex differences in diversity-scaling profiles with DAR (diversity-area relationship)

**Table S4-1.** Fitting the DAR models with 100 times of random permutations of samples for the male and female at each of the 15 microbiome sites (*This table was listed in Excel File: Microgenderome-OSI-File-C.xlsx*)

**Table S4-2.** The  $p$ -values of the permutation tests for the differences in the DAR parameters between the male and female at each of the 15 microbiome sites (No parameters exhibited significant differences  $p=0.05$ )

| Diversity order | Sample site | PL                          |          | PLEC  |       |          | MAD   |       |
|-----------------|-------------|-----------------------------|----------|-------|-------|----------|-------|-------|
|                 |             | $z$                         | $\ln(c)$ | $z$   | $d$   | $\ln(c)$ |       |       |
| $q = 0$         | Airway      | Anterior nares              | 0.617    | 0.659 | 0.608 | 0.549    | 0.654 | 0.583 |
|                 | Gut         | Stool                       | 0.734    | 0.758 | 0.829 | 0.884    | 0.813 | 0.926 |
|                 |             | Keratinized gingiva         | 0.941    | 0.904 | 0.938 | 0.953    | 0.968 | 0.456 |
|                 | Oral        | Buccal mucosa               | 0.799    | 0.908 | 0.999 | 0.948    | 0.979 | 0.656 |
|                 |             | Hard palate                 | 0.958    | 0.837 | 0.933 | 0.926    | 0.956 | 0.558 |
|                 |             | Palatine tonsils            | 0.778    | 0.726 | 0.993 | 0.854    | 0.856 | 0.987 |
|                 |             | Saliva                      | 0.994    | 0.852 | 0.992 | 0.840    | 0.838 | 0.906 |
|                 |             | Subgingival plaque          | 0.737    | 0.814 | 0.806 | 0.776    | 0.830 | 0.927 |
|                 |             | Supragingival plaque        | 0.987    | 0.981 | 0.982 | 0.976    | 0.974 | 0.804 |
|                 |             | Throat                      | 0.964    | 0.908 | 0.972 | 0.920    | 0.902 | 0.851 |
|                 | Skin        | Tongue dorsum               | 0.966    | 0.909 | 0.983 | 0.986    | 0.982 | 0.637 |
|                 |             | Left antecubital fossa      | 0.614    | 0.473 | 0.680 | 0.683    | 0.547 | 0.421 |
|                 |             | Left retroauricular crease  | 0.733    | 0.609 | 0.835 | 0.923    | 0.686 | 0.563 |
|                 |             | Right antecubital fossa     | 0.638    | 0.500 | 0.769 | 0.854    | 0.604 | 0.544 |
|                 |             | Right retroauricular crease | 0.555    | 0.406 | 0.699 | 0.832    | 0.505 | 0.465 |
| $q = 1$         | Airway      | Anterior nares              | 0.693    | 0.535 | 0.770 | 0.760    | 0.620 | 0.307 |
|                 | Gut         | Stool                       | 0.657    | 0.647 | 0.806 | 0.969    | 0.709 | 0.987 |
|                 |             | Keratinized gingiva         | 0.876    | 0.86  | 0.942 | 0.957    | 0.894 | 0.286 |
|                 | Oral        | Buccal mucosa               | 0.842    | 0.852 | 0.953 | 0.999    | 0.914 | 0.959 |
|                 |             | Hard palate                 | 0.902    | 0.954 | 0.961 | 0.960    | 0.973 | 0.889 |
|                 |             | Palatine tonsils            | 0.931    | 0.696 | 0.972 | 0.983    | 0.738 | 0.312 |
|                 |             | Saliva                      | 0.946    | 0.739 | 0.956 | 0.744    | 0.792 | 0.439 |
|                 |             | Subgingival plaque          | 0.740    | 0.992 | 0.749 | 0.761    | 0.955 | 0.246 |
|                 |             | Supragingival plaque        | 0.927    | 0.766 | 0.911 | 0.911    | 0.829 | 0.130 |
|                 |             | Throat                      | 0.793    | 0.756 | 0.988 | 0.757    | 0.842 | 0.797 |
|                 | Skin        | Tongue dorsum               | 0.954    | 0.984 | 0.995 | 0.949    | 0.989 | 0.959 |
|                 |             | Left antecubital fossa      | 0.536    | 0.692 | 0.548 | 0.600    | 0.654 | 0.704 |
|                 |             | Left retroauricular crease  | 0.539    | 0.648 | 0.651 | 0.815    | 0.666 | 0.781 |
|                 |             | Right antecubital fossa     | 0.586    | 0.596 | 0.761 | 0.909    | 0.684 | 0.959 |
|                 |             | Right retroauricular crease | 0.947    | 0.747 | 0.966 | 0.945    | 0.818 | 0.473 |
| $q = 2$         | Airway      | Anterior nares              | 0.757    | 0.533 | 0.871 | 0.885    | 0.646 | 0.385 |
|                 | Gut         | Stool                       | 0.841    | 0.753 | 0.871 | 0.941    | 0.777 | 0.734 |
|                 |             | Keratinized gingiva         | 0.715    | 0.849 | 0.765 | 0.882    | 0.958 | 0.286 |
|                 | Oral        | Buccal mucosa               | 0.799    | 0.888 | 0.928 | 0.961    | 0.940 | 0.851 |
|                 |             | Hard palate                 | 0.955    | 0.995 | 0.997 | 0.981    | 0.987 | 0.921 |
|                 |             | Palatine tonsils            | 0.667    | 0.558 | 0.913 | 0.840    | 0.680 | 0.746 |
|                 |             | Saliva                      | 0.961    | 0.795 | 0.864 | 0.658    | 0.904 | 0.579 |
|                 |             | Subgingival plaque          | 0.841    | 0.825 | 0.772 | 0.724    | 0.933 | 0.280 |
|                 |             | Supragingival plaque        | 0.942    | 0.794 | 0.889 | 0.843    | 0.820 | 0.277 |
|                 |             | Throat                      | 0.706    | 0.632 | 0.817 | 0.470    | 0.850 | 0.411 |
|                 | Skin        | Tongue dorsum               | 0.867    | 0.948 | 0.851 | 0.903    | 0.883 | 0.576 |
|                 |             | Left antecubital fossa      | 0.534    | 0.840 | 0.571 | 0.697    | 0.782 | 0.440 |
|                 |             | Left retroauricular crease  | 0.677    | 0.757 | 0.676 | 0.765    | 0.669 | 0.855 |
|                 |             | Right antecubital fossa     | 0.625    | 0.701 | 0.799 | 0.978    | 0.765 | 0.832 |
|                 |             | Right retroauricular crease | 0.857    | 0.923 | 0.945 | 0.952    | 0.923 | 0.638 |
| $q = 3$         | Airway      | Anterior nares              | 0.722    | 0.542 | 0.871 | 0.885    | 0.646 | 0.385 |
|                 | Gut         | Stool                       | 0.997    | 0.826 | 0.871 | 0.941    | 0.777 | 0.734 |
|                 |             | Keratinized gingiva         | 0.753    | 0.852 | 0.765 | 0.882    | 0.958 | 0.286 |
|                 | Oral        | Buccal mucosa               | 0.848    | 0.928 | 0.928 | 0.961    | 0.940 | 0.851 |
|                 |             | Hard palate                 | 0.934    | 0.993 | 0.997 | 0.981    | 0.987 | 0.921 |
|                 |             | Palatine tonsils            | 0.596    | 0.557 | 0.913 | 0.840    | 0.680 | 0.746 |
|                 |             | Saliva                      | 0.960    | 0.843 | 0.864 | 0.658    | 0.904 | 0.579 |
|                 |             | Subgingival plaque          | 0.964    | 0.731 | 0.772 | 0.724    | 0.933 | 0.280 |
|                 |             | Supragingival plaque        | 0.939    | 0.782 | 0.889 | 0.843    | 0.820 | 0.277 |
|                 |             | Throat                      | 0.707    | 0.621 | 0.817 | 0.470    | 0.850 | 0.411 |
|                 | Skin        | Tongue dorsum               | 0.769    | 0.912 | 0.851 | 0.903    | 0.883 | 0.576 |
|                 |             | Left antecubital fossa      | 0.518    | 0.869 | 0.571 | 0.697    | 0.782 | 0.440 |

|      |                             |       |       |       |       |       |       |
|------|-----------------------------|-------|-------|-------|-------|-------|-------|
|      | Left retroauricular crease  | 0.749 | 0.790 | 0.676 | 0.765 | 0.669 | 0.855 |
|      | Right antecubital fossa     | 0.548 | 0.693 | 0.799 | 0.978 | 0.765 | 0.832 |
|      | Right retroauricular crease | 0.836 | 0.960 | 0.945 | 0.952 | 0.923 | 0.638 |
|      | Saliva                      | 0.994 | 0.852 | 0.608 | 0.549 | 0.654 | 0.583 |
|      | Subgingival plaque          | 0.737 | 0.814 | 0.829 | 0.884 | 0.813 | 0.926 |
|      | Supragingival plaque        | 0.987 | 0.981 | 0.938 | 0.953 | 0.968 | 0.456 |
|      | Throat                      | 0.964 | 0.908 | 0.999 | 0.948 | 0.979 | 0.656 |
|      | Tongue dorsum               | 0.966 | 0.909 | 0.933 | 0.926 | 0.956 | 0.558 |
|      | Left antecubital fossa      | 0.614 | 0.473 | 0.993 | 0.854 | 0.856 | 0.987 |
| Skin | Left retroauricular crease  | 0.733 | 0.609 | 0.992 | 0.840 | 0.838 | 0.906 |
|      | Right antecubital fossa     | 0.638 | 0.500 | 0.806 | 0.776 | 0.830 | 0.927 |
|      | Right retroauricular crease | 0.555 | 0.406 | 0.982 | 0.976 | 0.974 | 0.804 |

---

## 5. Comparing the properties and motifs of basic species co-occurrence networks (SCN)

**Table S5-1.** The P/N (positive to negative links) ratios of male and female microbial networks at each of the 15 microbiome sites, and the *p*-values of permutation tests for the differences in *P/N* ratios between the male and female

| Sample site   |                             | Gender | Positive Links (+) | Negative Links (-) | P/N (+/-) Ratio | <i>p</i> -value of permutation test (1000 times of re-sampling) |
|---------------|-----------------------------|--------|--------------------|--------------------|-----------------|-----------------------------------------------------------------|
| Airway        | Anterior nares              | Male   | 8023               | 44                 | 182.341         | 0.602                                                           |
|               |                             | Female | 5384               | 2                  | 2692            |                                                                 |
| Gut           | Stool                       | Male   | 10936              | 59                 | 185.356         | 0.428                                                           |
|               |                             | Female | 8022               | 9                  | 891.333         |                                                                 |
| Oral          | Keratinized gingiva         | Male   | 7618               | 72                 | 105.806         | 0.868                                                           |
|               |                             | Female | 5738               | 40                 | 143.450         |                                                                 |
|               | Buccal mucosa               | Male   | 6142               | 20                 | 307.100         | 0.957                                                           |
|               |                             | Female | 3598               | 13                 | 276.769         |                                                                 |
|               | Hard palate                 | Male   | 5856               | 236                | 24.814          | 0.198                                                           |
|               |                             | Female | 3038               | 17                 | 178.706         |                                                                 |
|               | Palatine tonsils            | Male   | 10503              | 611                | 17.190          | 0.072                                                           |
|               |                             | Female | 5582               | 37                 | 150.865         |                                                                 |
|               | Saliva                      | Male   | 5575               | 48                 | 116.146         | 0.818                                                           |
|               |                             | Female | 1658               | 9                  | 184.222         |                                                                 |
|               | Subgingival plaque          | Male   | 7119               | 90                 | 79.100          | 0.679                                                           |
|               |                             | Female | 5733               | 37                 | 154.946         |                                                                 |
|               | Supragingival plaque        | Male   | 8989               | 116                | 77.491          | 0.723                                                           |
|               |                             | Female | 5707               | 127                | 44.937          |                                                                 |
|               | Throat                      | Male   | 6730               | 345                | 19.507          | 0.388                                                           |
|               |                             | Female | 3986               | 34                 | 117.235         |                                                                 |
| Tongue dorsum | Male                        | 18879  | 2474               | 7.631              | 0.167           |                                                                 |
|               | Female                      | 9821   | 567                | 17.321             |                 |                                                                 |
| Skin          | Left antecubital fossa      | Male   | 4722               | 10                 | 472.200         | 0.851                                                           |
|               |                             | Female | 826                | 13                 | 63.538          |                                                                 |
|               | Left retroauricular crease  | Male   | 22395              | 655                | 34.191          | 0.687                                                           |
|               |                             | Female | 24235              | 348                | 69.641          |                                                                 |
|               | Right antecubital fossa     | Male   | 4812               | 9                  | 534.667         | 0.872                                                           |
|               |                             | Female | 1784               | 0                  | ∞               |                                                                 |
|               | Right retroauricular crease | Male   | 22889              | 1501               | 15.249          | 0.289                                                           |
|               |                             | Female | 17458              | 286                | 61.042          |                                                                 |

\* The *p*-value of permutation tests for differences of P/N ratio between male and female

**Table S5-2A.** The occurrences of MAO-trios in the male and female microbial networks, respectively

| Microbiome Site | Gender              | MAO    | Trios with MAO              |    |    |    |     | Trios without MAO |   |     |   |       |       |
|-----------------|---------------------|--------|-----------------------------|----|----|----|-----|-------------------|---|-----|---|-------|-------|
|                 |                     |        | +                           | -  | -  | +  | Σ   | -                 | + | +   | + | Σ     |       |
| Airway          | Anterior nares      | Male   | <i>Staphylococcus.43282</i> | 0  | 0  | 0  | 58  | 58                | 0 | 118 | 0 | 63292 | 63410 |
|                 |                     | Female | <i>Staphylococcus.43282</i> | 0  | 0  | 0  | 306 | 306               | 0 | 0   | 0 | 44241 | 44241 |
| Gut             | Stool               | Male   | <i>Bacteroides.38931</i>    | 6  | 27 | 33 | 605 | 638               | 0 | 232 | 0 | 81108 | 81340 |
|                 |                     | Female | <i>Bacteroides.38931</i>    | 0  | 3  | 3  | 476 | 479               | 0 | 8   | 0 | 42970 | 42978 |
| Oral            | Keratinized gingiva | Male   | <i>Streptococcus.39439</i>  | 79 | 3  | 82 | 17  | 99                | 0 | 147 | 0 | 70823 | 70970 |
|                 |                     | Female | <i>Streptococcus.39439</i>  | 1  | 1  | 2  | 4   | 6                 | 0 | 48  | 0 | 59668 | 59716 |
|                 | Buccal mucosa       | Male   | <i>Streptococcus.39439</i>  | 0  | 0  | 0  | 7   | 7                 | 0 | 16  | 0 | 31605 | 31621 |
|                 |                     | Female | <i>Streptococcus.39439</i>  | 0  | 0  | 0  | 9   | 9                 | 0 | 10  | 0 | 11067 | 11077 |

|                      |                             |                            |                                |     |     |     |      |      |       |       |        |        |        |
|----------------------|-----------------------------|----------------------------|--------------------------------|-----|-----|-----|------|------|-------|-------|--------|--------|--------|
| Hard palate          | Male                        | <i>Streptococcus.39439</i> | 0                              | 0   | 0   | 51  | 51   | 0    | 794   | 0     | 29146  | 29940  |        |
|                      | Female                      | <i>Streptococcus.39439</i> | 0                              | 0   | 0   | 45  | 45   | 0    | 10    | 0     | 8166   | 8176   |        |
| Palatine tonsils     | Male                        | <i>Veillonella.34247</i>   | 0                              | 0   | 0   | 14  | 14   | 0    | 5507  | 0     | 56332  | 61839  |        |
|                      | Female                      | <i>Campylobacter.39329</i> | 0                              | 0   | 0   | 417 | 417  | 0    | 45    | 0     | 20122  | 20167  |        |
| Saliva               | Male                        | <i>Campylobacter.39329</i> | 0                              | 0   | 0   | 357 | 357  | 0    | 101   | 0     | 24244  | 24345  |        |
|                      | Female                      | <i>Campylobacter.39329</i> | 0                              | 0   | 0   | 13  | 13   | 0    | 0     | 0     | 2352   | 2352   |        |
| Subgingival plaque   | Male                        | <i>Streptococcus.39439</i> | 3                              | 12  | 15  | 132 | 147  | 0    | 180   | 0     | 26337  | 26517  |        |
|                      | Female                      | <i>Streptococcus.39439</i> | 3                              | 2   | 5   | 78  | 83   | 0    | 43    | 0     | 18323  | 18366  |        |
| Supragingival plaque | Male                        | <i>Lautropia.20</i>        | 0                              | 0   | 0   | 753 | 753  | 0    | 434   | 0     | 37172  | 37606  |        |
|                      | Female                      | <i>Streptococcus.39439</i> | 0                              | 0   | 0   | 64  | 64   | 0    | 672   | 0     | 18001  | 18673  |        |
| Throat               | Male                        | <i>Campylobacter.39329</i> | 0                              | 0   | 0   | 361 | 361  | 0    | 2558  | 0     | 38368  | 40926  |        |
|                      | Female                      | <i>Campylobacter.39329</i> | 0                              | 0   | 0   | 160 | 160  | 0    | 17    | 0     | 12688  | 12705  |        |
| Tongue dorsum        | Male                        | <i>Veillonella.34247</i>   | 1                              | 7   | 8   | 4   | 12   | 0    | 56417 | 0     | 217086 | 273503 |        |
|                      | Female                      | <i>Veillonella.34247</i>   | 0                              | 0   | 0   | 136 | 136  | 0    | 4662  | 0     | 57658  | 62320  |        |
| Skin                 | Left antecubital fossa      | Male                       | <i>Propionibacterium.43540</i> | 0   | 0   | 0   | 152  | 152  | 0     | 11    | 0      | 29295  | 29306  |
|                      |                             | Female                     | <i>Propionibacterium.43540</i> | 0   | 0   | 0   | 25   | 25   | 0     | 28    | 0      | 1552   | 1580   |
|                      | Left retroauricular crease  | Male                       | <i>Staphylococcus.43282</i>    | 64  | 72  | 136 | 500  | 636  | 0     | 4806  | 0      | 385071 | 389877 |
|                      |                             | Female                     | <i>Staphylococcus.43282</i>    | 1   | 36  | 37  | 1399 | 1436 | 0     | 2291  | 0      | 692861 | 695152 |
|                      | Right antecubital fossa     | Male                       | <i>Propionibacterium.43540</i> | 0   | 0   | 0   | 397  | 397  | 0     | 12    | 0      | 33067  | 33079  |
|                      |                             | Female                     | <i>Propionibacterium.43540</i> | 0   | 0   | 0   | 221  | 221  | 0     | 0     | 0      | 6974   | 6974   |
|                      | Right retroauricular crease | Male                       | <i>Propionibacterium.43540</i> | 228 | 406 | 634 | 1203 | 1837 | 0     | 17806 | 2      | 484308 | 502116 |
|                      |                             | Female                     | <i>Staphylococcus.43282</i>    | 0   | 0   | 0   | 893  | 893  | 0     | 1952  | 0      | 411564 | 413516 |

**Table S5-2B.** The occurrences of MAO-trios with a handle in the male and female microbial networks, respectively

| Microbiome Site | Gender                     | Single-Link MAO |       |       | Double-Link MAO |      |     |      | Triple-Link MAO |     |    |     |       |       |
|-----------------|----------------------------|-----------------|-------|-------|-----------------|------|-----|------|-----------------|-----|----|-----|-------|-------|
|                 |                            | -               | +     | Σ     | -               | +    | +   | Σ    | -               | +   | +  | +   | Σ     |       |
| Airway          | Anterior nares             | Male            | 0     | 85    | 85              | 0    | 0   | 114  | 114             | 0   | 0  | 0   | 91    | 91    |
|                 |                            | Female          | 0     | 169   | 169             | 0    | 0   | 630  | 630             | 0   | 0  | 0   | 1455  | 1455  |
| Gut             | Stool                      | Male            | 305   | 1571  | 1876            | 81   | 48  | 1362 | 1491            | 4   | 25 | 92  | 4133  | 4254  |
|                 |                            | Female          | 64    | 297   | 361             | 0    | 0   | 81   | 81              | 0   | 0  | 3   | 3136  | 3139  |
| Oral            | Keratinized gingiva        | Male            | 18560 | 156   | 18716           | 3682 | 5   | 51   | 3738            | 253 | 0  | 1   | 10    | 264   |
|                 |                            | Female          | 2309  | 26    | 2335            | 21   | 0   | 10   | 31              | 0   | 0  | 0   | 1     | 1     |
|                 | Buccal mucosa              | Male            | 0     | 63    | 63              | 0    | 0   | 18   | 18              | 0   | 0  | 0   | 4     | 4     |
|                 |                            | Female          | 0     | 23    | 23              | 0    | 0   | 6    | 6               | 0   | 0  | 0   | 7     | 7     |
|                 | Hard palate                | Male            | 0     | 1140  | 1140            | 0    | 0   | 266  | 266             | 0   | 0  | 0   | 55    | 55    |
|                 |                            | Female          | 0     | 272   | 272             | 0    | 0   | 192  | 192             | 0   | 0  | 0   | 88    | 88    |
|                 | Palatine tonsils           | Male            | 0     | 583   | 583             | 0    | 0   | 26   | 26              | 0   | 0  | 0   | 7     | 7     |
|                 |                            | Female          | 128   | 4353  | 4481            | 0    | 0   | 2889 | 2889            | 0   | 0  | 0   | 1428  | 1428  |
|                 | Saliva                     | Male            | 0     | 7387  | 7387            | 0    | 0   | 4077 | 4077            | 0   | 0  | 0   | 1206  | 1206  |
|                 |                            | Female          | 0     | 67    | 67              | 0    | 0   | 4    | 4               | 0   | 0  | 0   | 2     | 2     |
|                 | Subgingival plaque         | Male            | 278   | 3498  | 3776            | 13   | 15  | 1072 | 1100            | 0   | 2  | 16  | 263   | 281   |
|                 |                            | Female          | 169   | 958   | 1127            | 15   | 2   | 154  | 171             | 1   | 0  | 0   | 111   | 112   |
|                 | Supragingival plaque       | Male            | 0     | 1565  | 1565            | 0    | 0   | 1258 | 1258            | 0   | 0  | 0   | 4826  | 4826  |
|                 |                            | Female          | 0     | 324   | 324             | 0    | 0   | 102  | 102             | 0   | 0  | 0   | 112   | 112   |
|                 | Throat                     | Male            | 0     | 12096 | 12096           | 0    | 0   | 6235 | 6235            | 0   | 0  | 0   | 1658  | 1658  |
|                 |                            | Female          | 157   | 1635  | 1792            | 0    | 0   | 1094 | 1094            | 0   | 0  | 0   | 393   | 393   |
| Tongue dorsum   | Male                       | 7246            | 3004  | 10250 | 82              | 198  | 16  | 296  | 0               | 3   | 1  | 0   | 4     |       |
|                 | Female                     | 0               | 2496  | 2496  | 0               | 0    | 335 | 335  | 0               | 0   | 0  | 218 | 218   |       |
| Skin            | Left antecubital fossa     | Male            | 0     | 5732  | 5732            | 0    | 0   | 1468 | 1468            | 0   | 0  | 0   | 373   | 373   |
|                 |                            | Female          | 0     | 166   | 166             | 0    | 0   | 45   | 45              | 0   | 0  | 0   | 12    | 12    |
|                 | Left retroauricular crease | Male            | 9686  | 2340  | 12026           | 2019 | 316 | 1013 | 3348            | 164 | 94 | 219 | 2126  | 2603  |
|                 |                            | Female          | 3570  | 633   | 4203            | 34   | 96  | 1623 | 1753            | 0   | 10 | 287 | 14584 | 14881 |
|                 | Right antecubital fossa    | Male            | 0     | 8961  | 8961            | 0    | 0   | 4746 | 4746            | 0   | 0  | 0   | 1794  | 1794  |
|                 |                            | Female          | 0     | 1726  | 1726            | 0    | 0   | 1552 | 1552            | 0   | 0  | 0   | 903   | 903   |

|                             |        |       |       |       |      |      |       |       |      |      |      |       |       |
|-----------------------------|--------|-------|-------|-------|------|------|-------|-------|------|------|------|-------|-------|
| Right retroauricular crease | Male   | 14240 | 40770 | 55010 | 3670 | 3141 | 12410 | 19221 | 1038 | 1738 | 3088 | 11473 | 17337 |
|                             | Female | 0     | 1827  | 1827  | 0    | 0    | 2761  | 2761  | 0    | 0    | 0    | 6076  | 6076  |

**Table S5-3A.** The  $p$ -values of permutation tests for the differences in the numbers of occurrence of MAO-trios between the male and female microbial networks at each of the 15 microbiome sites (with 1000 times of re-sampling)

| Treatment |                             | Trios with MAO                                                                    |                                                                                   |                                                                                   |                                                                                   |                                                                                   | Trios without MAO                                                                 |                                                                                     |                                                                                     |                                                                                     |                                                                                     |                                                                                     |          |
|-----------|-----------------------------|-----------------------------------------------------------------------------------|-----------------------------------------------------------------------------------|-----------------------------------------------------------------------------------|-----------------------------------------------------------------------------------|-----------------------------------------------------------------------------------|-----------------------------------------------------------------------------------|-------------------------------------------------------------------------------------|-------------------------------------------------------------------------------------|-------------------------------------------------------------------------------------|-------------------------------------------------------------------------------------|-------------------------------------------------------------------------------------|----------|
|           |                             |  |  |  |  |  |  |  |  |  |  |  |          |
|           |                             | +                                                                                 | -                                                                                 | -                                                                                 | +                                                                                 | +                                                                                 | -                                                                                 | +                                                                                   | +                                                                                   | +                                                                                   | +                                                                                   | +                                                                                   | +        |
|           |                             | -                                                                                 | +                                                                                 | +                                                                                 | -                                                                                 | -                                                                                 | -                                                                                 | -                                                                                   | -                                                                                   | -                                                                                   | -                                                                                   | -                                                                                   | -        |
|           |                             | $\Sigma$                                                                          | $\Sigma$                                                                          | $\Sigma$                                                                          | $\Sigma$                                                                          | $\Sigma$                                                                          | $\Sigma$                                                                          | $\Sigma$                                                                            | $\Sigma$                                                                            | $\Sigma$                                                                            | $\Sigma$                                                                            | $\Sigma$                                                                            | $\Sigma$ |
| Airway    | Anterior nares              | 1                                                                                 | 1                                                                                 | 1                                                                                 | 1                                                                                 | 1                                                                                 | 1                                                                                 | 1                                                                                   | 1                                                                                   | 0.014                                                                               | 0.014                                                                               | 1                                                                                   | 1        |
| Gut       | Stool                       | 0.450                                                                             | 0.619                                                                             | 0.499                                                                             | 1                                                                                 | 1                                                                                 | 1                                                                                 | 1                                                                                   | 1                                                                                   | 0.191                                                                               | 0.228                                                                               | 1                                                                                   | 1        |
| Oral      | Keratinized gingiva         | 0.676                                                                             | 0.313                                                                             | 0.318                                                                             | 1                                                                                 | 1                                                                                 | 1                                                                                 | 1                                                                                   | 1                                                                                   | 0.140                                                                               | 0.301                                                                               | 1                                                                                   | 1        |
|           | Buccal mucosa               | 1                                                                                 | 1                                                                                 | 1                                                                                 | 1                                                                                 | 1                                                                                 | 1                                                                                 | 1                                                                                   | 1                                                                                   | 0.782                                                                               | 0.782                                                                               | 1                                                                                   | 1        |
|           | Hard palate                 | 1                                                                                 | 1                                                                                 | 1                                                                                 | 1                                                                                 | 1                                                                                 | 1                                                                                 | 1                                                                                   | 1                                                                                   | 0.901                                                                               | 0.905                                                                               | 1                                                                                   | 1        |
|           | Palatine tonsils            | 1                                                                                 | 1                                                                                 | 1                                                                                 | 1                                                                                 | 1                                                                                 | 1                                                                                 | 1                                                                                   | 1                                                                                   | 0.293                                                                               | 0.305                                                                               | 1                                                                                   | 1        |
|           | Saliva                      | 1                                                                                 | 1                                                                                 | 1                                                                                 | 1                                                                                 | 1                                                                                 | 1                                                                                 | 1                                                                                   | 1                                                                                   | 0.009                                                                               | 0.009                                                                               | 1                                                                                   | 1        |
|           | Subgingival plaque          | 0.079                                                                             | 1                                                                                 | 0.117                                                                             | 1                                                                                 | 1                                                                                 | 1                                                                                 | 1                                                                                   | 1                                                                                   | 0.429                                                                               | 0.386                                                                               | 1                                                                                   | 1        |
|           | Supragingival plaque        | 1                                                                                 | 1                                                                                 | 1                                                                                 | 1                                                                                 | 1                                                                                 | 1                                                                                 | 1                                                                                   | 1                                                                                   | 0.007                                                                               | 0.007                                                                               | 1                                                                                   | 1        |
|           | Throat                      | 1                                                                                 | 1                                                                                 | 1                                                                                 | 1                                                                                 | 1                                                                                 | 1                                                                                 | 1                                                                                   | 1                                                                                   | 0.388                                                                               | 0.407                                                                               | 1                                                                                   | 1        |
|           | Tongue dorsum               | 0.211                                                                             | 0.130                                                                             | 0.189                                                                             | 1                                                                                 | 1                                                                                 | 1                                                                                 | 1                                                                                   | 1                                                                                   | 0.037                                                                               | 0.069                                                                               | 1                                                                                   | 1        |
| Skin      | Left antecubital fossa      | 1                                                                                 | 1                                                                                 | 1                                                                                 | 1                                                                                 | 1                                                                                 | 1                                                                                 | 1                                                                                   | 1                                                                                   | 0.093                                                                               | 0.093                                                                               | 1                                                                                   | 1        |
|           | Left retroauricular crease  | 0.681                                                                             | 0.323                                                                             | 0.468                                                                             | 1                                                                                 | 1                                                                                 | 1                                                                                 | 1                                                                                   | 1                                                                                   | 0.002                                                                               | 0.07                                                                                | 1                                                                                   | 1        |
|           | Right antecubital fossa     | 1                                                                                 | 1                                                                                 | 1                                                                                 | 1                                                                                 | 1                                                                                 | 1                                                                                 | 1                                                                                   | 1                                                                                   | 0.475                                                                               | 0.475                                                                               | 1                                                                                   | 1        |
|           | Right retroauricular crease | 0.033                                                                             | 0.087                                                                             | 0.046                                                                             | 1                                                                                 | 1                                                                                 | 1                                                                                 | 1                                                                                   | 1                                                                                   | 0.662                                                                               | 0.335                                                                               | 1                                                                                   | 1        |

**Table S5-3B.** The  $p$ -values of permutation tests for the differences in the numbers of occurrences of MAO-trios with a handle between the male and female microbial networks at each of the 15 microbiome sites (with 1000 times of re-sampling)

| Treatment |                             | Single-Link MAO                                                                     |                                                                                     |                                                                                     | Double-Link MAO                                                                     |                                                                                     |                                                                                     |                                                                                     | Triple-Link MAO                                                                       |                                                                                       |                                                                                       |                                                                                       |          |       |
|-----------|-----------------------------|-------------------------------------------------------------------------------------|-------------------------------------------------------------------------------------|-------------------------------------------------------------------------------------|-------------------------------------------------------------------------------------|-------------------------------------------------------------------------------------|-------------------------------------------------------------------------------------|-------------------------------------------------------------------------------------|---------------------------------------------------------------------------------------|---------------------------------------------------------------------------------------|---------------------------------------------------------------------------------------|---------------------------------------------------------------------------------------|----------|-------|
|           |                             |  |  |  |  |  |  |  |  |  |  |  |          |       |
|           |                             | -                                                                                   | +                                                                                   | $\Sigma$                                                                            | -                                                                                   | +                                                                                   | +                                                                                   | $\Sigma$                                                                            | -                                                                                     | +                                                                                     | +                                                                                     | +                                                                                     | $\Sigma$ |       |
|           |                             | -                                                                                   | +                                                                                   | $\Sigma$                                                                            | -                                                                                   | -                                                                                   | +                                                                                   | $\Sigma$                                                                            | -                                                                                     | -                                                                                     | +                                                                                     | +                                                                                     | $\Sigma$ |       |
| Airway    | Anterior nares              | 1                                                                                   | 0.424                                                                               | 0.441                                                                               | 1                                                                                   | 1                                                                                   | 0.021                                                                               | 0.021                                                                               | 1                                                                                     | 1                                                                                     | 1                                                                                     | 1                                                                                     | 0.017    | 0.017 |
| Gut       | Stool                       | 0.039                                                                               | 0.035                                                                               | 0.015                                                                               | 0.487                                                                               | 0.119                                                                               | 0.015                                                                               | 0.016                                                                               | 0.666                                                                                 | 0.545                                                                                 | 0.462                                                                                 | 0.381                                                                                 | 0.381    |       |
| Oral      | Keratinized gingiva         | 0.174                                                                               | 0.198                                                                               | 0.175                                                                               | 0.305                                                                               | 0.592                                                                               | 0.124                                                                               | 0.305                                                                               | 0.324                                                                                 | 1                                                                                     | 0.562                                                                                 | 0.253                                                                                 | 0.326    |       |
|           | Buccal mucosa               | 1                                                                                   | 0.341                                                                               | 0.35                                                                                | 1                                                                                   | 1                                                                                   | 0.480                                                                               | 0.48                                                                                | 1                                                                                     | 1                                                                                     | 1                                                                                     | 0.465                                                                                 | 0.465    |       |
|           | Hard palate                 | 1                                                                                   | 0.129                                                                               | 0.152                                                                               | 1                                                                                   | 1                                                                                   | 0.736                                                                               | 0.737                                                                               | 1                                                                                     | 1                                                                                     | 1                                                                                     | 0.704                                                                                 | 0.704    |       |
|           | Palatine tonsils            | 0.446                                                                               | 0.299                                                                               | 0.307                                                                               | 1                                                                                   | 1                                                                                   | 0.369                                                                               | 0.377                                                                               | 1                                                                                     | 1                                                                                     | 1                                                                                     | 0.365                                                                                 | 0.371    |       |
|           | Saliva                      | 1                                                                                   | 0.002                                                                               | 0.002                                                                               | 1                                                                                   | 1                                                                                   | 0.006                                                                               | 0.006                                                                               | 1                                                                                     | 1                                                                                     | 1                                                                                     | 0.016                                                                                 | 0.016    |       |
|           | Subgingival plaque          | 0.254                                                                               | 0.186                                                                               | 0.184                                                                               | 0.246                                                                               | 0.14                                                                                | 0.161                                                                               | 0.164                                                                               | 0.122                                                                                 | 0.084                                                                                 | 0.06                                                                                  | 0.279                                                                                 | 0.261    |       |
|           | Supragingival plaque        | 1                                                                                   | 0.298                                                                               | 0.294                                                                               | 1                                                                                   | 1                                                                                   | 0.153                                                                               | 0.154                                                                               | 1                                                                                     | 1                                                                                     | 1                                                                                     | 0.005                                                                                 | 0.005    |       |
|           | Throat                      | 0.314                                                                               | 0.004                                                                               | 0.004                                                                               | 1                                                                                   | 1                                                                                   | 0.065                                                                               | 0.064                                                                               | 1                                                                                     | 1                                                                                     | 1                                                                                     | 0.294                                                                                 | 0.300    |       |
|           | Tongue dorsum               | 0.018                                                                               | 0.903                                                                               | 0.295                                                                               | 0.065                                                                               | 0.201                                                                               | 0.442                                                                               | 0.871                                                                               | 1                                                                                     | 0.103                                                                                 | 0.294                                                                                 | 0.107                                                                                 | 0.129    |       |
| Skin      | Left antecubital fossa      | 1                                                                                   | 0.073                                                                               | 0.073                                                                               | 1                                                                                   | 1                                                                                   | 0.037                                                                               | 0.037                                                                               | 1                                                                                     | 1                                                                                     | 1                                                                                     | 0.151                                                                                 | 0.151    |       |
|           | Left retroauricular crease  | 0.66                                                                                | 0.076                                                                               | 0.586                                                                               | 0.389                                                                               | 0.573                                                                               | 0.382                                                                               | 0.548                                                                               | 0.379                                                                                 | 0.571                                                                                 | 0.853                                                                                 | 0.004                                                                                 | 0.029    |       |
|           | Right antecubital fossa     | 1                                                                                   | 0.161                                                                               | 0.161                                                                               | 1                                                                                   | 1                                                                                   | 0.211                                                                               | 0.211                                                                               | 1                                                                                     | 1                                                                                     | 1                                                                                     | 0.584                                                                                 | 0.584    |       |
|           | Right retroauricular crease | 0.315                                                                               | 0.56                                                                                | 0.419                                                                               | 0.185                                                                               | 0.083                                                                               | 0.586                                                                               | 0.452                                                                               | 0.124                                                                                 | 0.069                                                                                 | 0.06                                                                                  | 0.515                                                                                 | 0.312    |       |

**Table S5-4.** Basic network properties of the microbial networks for the male and female, respectively, at each of the 15 microbiome sites

|        | Treatment                   | Gender | Num. of Nodes | Num. of Edges | Average Degree | Avg. Local Cluster Coefficient | Diameter | Average Path Length | Connected Components | Network Density | Network Modularity | Num. of Communities |
|--------|-----------------------------|--------|---------------|---------------|----------------|--------------------------------|----------|---------------------|----------------------|-----------------|--------------------|---------------------|
| Airway | Anterior nares              | Male   | 630           | 8068          | 25.613         | 0.685                          | 11       | 3.922               | 10                   | 0.041           | 0.795              | 28                  |
|        |                             | Female | 440           | 5387          | 24.486         | 0.772                          | 13       | 4.344               | 8                    | 0.056           | 0.720              | 20                  |
| Gut    | Stool                       | Male   | 1115          | 10996         | 19.724         | 0.637                          | 15       | 5.276               | 7                    | 0.018           | 0.773              | 58                  |
|        |                             | Female | 1082          | 8032          | 14.847         | 0.655                          | 14       | 5.610               | 13                   | 0.014           | 0.865              | 47                  |
|        | Keratinized gingiva         | Male   | 731           | 7691          | 21.042         | 0.611                          | 11       | 4.103               | 10                   | 0.029           | 0.626              | 29                  |
|        |                             | Female | 597           | 5779          | 19.360         | 0.593                          | 15       | 4.866               | 4                    | 0.032           | 0.574              | 25                  |
|        | Buccal mucosa               | Male   | 758           | 6163          | 16.261         | 0.553                          | 14       | 4.599               | 8                    | 0.021           | 0.723              | 38                  |
|        |                             | Female | 695           | 3612          | 10.394         | 0.526                          | 15       | 5.323               | 11                   | 0.015           | 0.791              | 31                  |
|        | Hard palate                 | Male   | 789           | 6093          | 15.445         | 0.482                          | 12       | 3.939               | 9                    | 0.020           | 0.634              | 59                  |
|        |                             | Female | 611           | 3056          | 10.003         | 0.521                          | 14       | 4.699               | 23                   | 0.016           | 0.709              | 68                  |
|        | Palatine tonsils            | Male   | 1052          | 11115         | 21.131         | 0.483                          | 11       | 3.958               | 3                    | 0.020           | 0.640              | 98                  |
|        |                             | Female | 847           | 5620          | 13.270         | 0.476                          | 12       | 4.642               | 11                   | 0.016           | 0.669              | 58                  |
| Oral   | Saliva                      | Male   | 802           | 5624          | 14.025         | 0.460                          | 13       | 4.122               | 15                   | 0.018           | 0.555              | 58                  |
|        |                             | Female | 616           | 1668          | 5.416          | 0.498                          | 15       | 5.956               | 39                   | 0.009           | 0.796              | 63                  |
|        | Subgingival plaque          | Male   | 1159          | 7210          | 12.442         | 0.506                          | 14       | 4.710               | 15                   | 0.011           | 0.750              | 44                  |
|        |                             | Female | 1069          | 5771          | 10.797         | 0.512                          | 15       | 5.049               | 33                   | 0.010           | 0.751              | 79                  |
|        | Supragingival plaque        | Male   | 1146          | 9106          | 15.892         | 0.524                          | 12       | 4.388               | 11                   | 0.014           | 0.721              | 101                 |
|        |                             | Female | 999           | 5835          | 11.682         | 0.512                          | 13       | 4.845               | 11                   | 0.012           | 0.726              | 83                  |
|        | Throat                      | Male   | 821           | 7076          | 17.238         | 0.475                          | 11       | 3.972               | 10                   | 0.021           | 0.430              | 77                  |
|        |                             | Female | 751           | 4021          | 10.708         | 0.526                          | 17       | 4.818               | 20                   | 0.014           | 0.741              | 40                  |
|        | Tongue dorsum               | Male   | 1058          | 21354         | 40.367         | 0.516                          | 9        | 3.008               | 2                    | 0.038           | 0.400              | 146                 |
|        |                             | Female | 887           | 10389         | 23.425         | 0.503                          | 11       | 3.279               | 7                    | 0.026           | 0.567              | 73                  |
|        | Left antecubital fossa      | Male   | 452           | 4733          | 20.942         | 0.525                          | 13       | 3.994               | 7                    | 0.046           | 0.548              | 38                  |
|        |                             | Female | 240           | 840           | 7.000          | 0.550                          | 11       | 4.796               | 8                    | 0.029           | 0.734              | 19                  |
| Skin   | Left retroauricular crease  | Male   | 745           | 23051         | 61.882         | 0.579                          | 11       | 2.796               | 4                    | 0.083           | 0.392              | 51                  |
|        |                             | Female | 588           | 24584         | 83.619         | 0.677                          | 9        | 2.732               | 4                    | 0.142           | 0.225              | 24                  |
|        | Right antecubital fossa     | Male   | 416           | 4822          | 23.183         | 0.577                          | 12       | 3.884               | 7                    | 0.056           | 0.445              | 46                  |
|        |                             | Female | 257           | 1785          | 13.891         | 0.593                          | 11       | 4.082               | 9                    | 0.054           | 0.450              | 24                  |
|        | Right retroauricular crease | Male   | 706           | 24391         | 69.096         | 0.608                          | 10       | 2.853               | 2                    | 0.098           | 0.293              | 147                 |
|        |                             | Female | 530           | 17745         | 66.962         | 0.684                          | 10       | 2.759               | 7                    | 0.127           | 0.319              | 24                  |

**Table S5-5.** The  $p$ -values of permutation tests for the differences in network properties between the male and female microbial networks at each of the 15 microbiome sites (with 1000 times of re-sampling)

|        | Treatment                   | Num. of Nodes | Num. of Edges | Average Degree | Avg. Local Cluster Coefficient | Diameter | Average Path Length | Connected Components | Network Density | Network Modularity | Num. of Communities |
|--------|-----------------------------|---------------|---------------|----------------|--------------------------------|----------|---------------------|----------------------|-----------------|--------------------|---------------------|
| Airway | Anterior nares              | 0.000         | 0.384         | 0.929          | 0.001                          | 0.586    | 0.668               | 0.565                | 0.151           | 0.242              | 0.709               |
| Gut    | Stool                       | 0.182         | 0.083         | 0.029          | 0.337                          | 0.744    | 0.177               | 0.119                | 0.014           | 0.040              | 0.671               |
|        | Keratinized gingiva         | 0.000         | 0.202         | 0.652          | 0.295                          | 0.058    | 0.053               | 0.015                | 0.457           | 0.362              | 0.828               |
|        | Buccal mucosa               | 0.000         | 0.052         | 0.022          | 0.178                          | 0.807    | 0.219               | 0.495                | 0.026           | 0.132              | 0.662               |
|        | Hard palate                 | 0.000         | 0.049         | 0.108          | 0.077                          | 0.511    | 0.129               | 0.006                | 0.286           | 0.087              | 0.541               |
|        | Palatine tonsils            | 0.000         | 0.008         | 0.018          | 0.671                          | 0.756    | 0.021               | 0.019                | 0.148           | 0.611              | 0.289               |
| Oral   | Saliva                      | 0.000         | 0.012         | 0.004          | 0.135                          | 0.688    | 0.054               | 0.005                | 0.001           | 0.000              | 0.747               |
|        | Subgingival plaque          | 0.000         | 0.476         | 0.534          | 0.750                          | 0.834    | 0.486               | 0.016                | 0.565           | 0.983              | 0.249               |
|        | Supragingival plaque        | 0.000         | 0.074         | 0.124          | 0.541                          | 0.785    | 0.207               | 1.000                | 0.325           | 0.887              | 0.448               |
|        | Throat                      | 0.001         | 0.097         | 0.058          | 0.010                          | 0.014    | 0.132               | 0.023                | 0.027           | 0.000              | 0.181               |
|        | Tongue dorsum               | 0.000         | 0.014         | 0.023          | 0.485                          | 0.329    | 0.318               | 0.018                | 0.053           | 0.083              | 0.415               |
|        | Left antecubital fossa      | 0.000         | 0.248         | 0.267          | 0.475                          | 0.604    | 0.263               | 0.789                | 0.485           | 0.288              | 0.761               |
| Skin   | Left retroauricular crease  | 0.000         | 0.804         | 0.180          | 0.000                          | 0.236    | 0.760               | 1.000                | 0.001           | 0.273              | 0.687               |
|        | Right antecubital fossa     | 0.000         | 0.213         | 0.336          | 0.677                          | 0.843    | 0.680               | 0.388                | 0.929           | 0.971              | 0.682               |
|        | Right retroauricular crease | 0.000         | 0.416         | 0.915          | 0.006                          | 1.000    | 0.685               | 0.000                | 0.212           | 0.930              | 0.355               |

**Table S5-6.** The strongly connected clusters in the microbial networks of the male and female, respectively, at each of the 15 microbiome sites  
(This table was listed in Excel File: Microgenderome-OSI-File-C.xlsx)

## 6. Shared core/periphery network (CPN) analysis between the male and female

**Table S6-1.** The results of shared core and periphery OTUs between the male and female microbial networks at each of the 15 microbiome sites, based on the *actual-network strategy*.

|                             |                              | Core                    |                      |         |         |                      |         |         |        |
|-----------------------------|------------------------------|-------------------------|----------------------|---------|---------|----------------------|---------|---------|--------|
| Sample Sites                |                              | Observed shared OTUs    | Algorithm A1         |         |         | Algorithm A2         |         |         |        |
|                             |                              |                         | Expected shared OTUs | O/E (%) | p-value | Expected shared OTUs | O/E (%) | p-value |        |
| Airway                      | Anterior nares               | 118                     | 397                  | 29.72   | <0.001  | 392.705              | 30.05   | <0.001  |        |
| Gut                         | Stool                        | 217                     | 923                  | 23.51   | <0.001  | 879.419              | 24.68   | <0.001  |        |
|                             | Attached Keratinized gingiva | 153                     | 500                  | 30.60   | <0.001  | 495.224              | 30.90   | <0.001  |        |
| Oral                        | Buccal mucosa                | 156                     | 581                  | 26.85   | <0.001  | 579.364              | 26.93   | <0.001  |        |
|                             | Hard palate                  | 153                     | 571                  | 26.80   | <0.001  | 569.912              | 26.85   | <0.001  |        |
|                             | Palatine Tonsils             | 197                     | 744                  | 26.48   | <0.001  | 740.826              | 26.59   | <0.001  |        |
|                             | Saliva                       | 153                     | 532                  | 28.76   | <0.001  | 531.808              | 28.77   | <0.001  |        |
|                             | Subgingival plaque           | 240                     | 880                  | 27.27   | <0.001  | 875.270              | 27.42   | <0.001  |        |
|                             | Supragingival plaque         | 243                     | 837                  | 29.03   | <0.001  | 835.601              | 29.08   | <0.001  |        |
|                             | Throat                       | 162                     | 616                  | 26.30   | <0.001  | 608.554              | 26.62   | <0.001  |        |
|                             | Tongue dorsum                | 210                     | 733                  | 28.65   | <0.001  | 732.145              | 28.68   | <0.001  |        |
|                             | Skin                         | Left Antecubital fossa  | 46                   | 294     | 15.65   | <0.001               | 278.855 | 16.50   | <0.001 |
|                             |                              | Right Antecubital fossa | 58                   | 238     | 24.37   | <0.001               | 226.565 | 25.60   | <0.001 |
| Left Retroauricular crease  |                              | 130                     | 595                  | 21.85   | <0.001  | 576.601              | 22.55   | <0.001  |        |
| Right Retroauricular crease |                              | 143                     | 478                  | 29.92   | <0.001  | 468.503              | 30.52   | <0.001  |        |

  

|                             |                              | Periphery               |                      |         |         |                      |         |         |        |
|-----------------------------|------------------------------|-------------------------|----------------------|---------|---------|----------------------|---------|---------|--------|
| Sample Sites                |                              | Observed shared OTUs    | Algorithm A1         |         |         | Algorithm A2         |         |         |        |
|                             |                              |                         | Expected shared OTUs | O/E (%) | p-value | Expected shared OTUs | O/E (%) | p-value |        |
| Airway                      | Anterior nares               | 97                      | 454                  | 21.37   | <0.001  | 438.469              | 22.12   | <0.001  |        |
| Gut                         | Stool                        | 185                     | 868                  | 21.31   | <0.001  | 831.536              | 22.25   | <0.001  |        |
|                             | Attached Keratinized gingiva | 142                     | 529                  | 26.84   | <0.001  | 522.736              | 27.16   | <0.001  |        |
| Oral                        | Buccal mucosa                | 130                     | 582                  | 22.34   | <0.001  | 580.222              | 22.41   | <0.001  |        |
|                             | Hard palate                  | 113                     | 559                  | 20.21   | <0.001  | 555.969              | 20.32   | <0.001  |        |
|                             | Palatine Tonsils             | 176                     | 778                  | 22.62   | <0.001  | 774.493              | 22.72   | <0.001  |        |
|                             | Saliva                       | 144                     | 585                  | 24.62   | <0.001  | 583.895              | 24.66   | <0.001  |        |
|                             | Subgingival plaque           | 201                     | 903                  | 22.26   | <0.001  | 896.902              | 22.41   | <0.001  |        |
|                             | Supragingival plaque         | 202                     | 859                  | 23.52   | <0.001  | 855.728              | 23.61   | <0.001  |        |
|                             | Throat                       | 151                     | 639                  | 23.63   | <0.001  | 627.059              | 24.08   | <0.001  |        |
|                             | Tongue dorsum                | 208                     | 790                  | 26.33   | <0.001  | 788.833              | 26.37   | <0.001  |        |
|                             | Skin                         | Left Antecubital fossa  | 41                   | 307     | 13.36   | <0.001               | 278.500 | 14.72   | <0.001 |
|                             |                              | Right Antecubital fossa | 52                   | 321     | 16.20   | <0.001               | 294.514 | 17.66   | <0.001 |
| Left Retroauricular crease  |                              | 127                     | 477                  | 26.62   | <0.001  | 472.869              | 26.86   | <0.001  |        |
| Right Retroauricular crease |                              | 105                     | 506                  | 20.75   | <0.001  | 487.652              | 21.53   | <0.001  |        |

**Table S6-2.** The results of permutation tests for shared core or periphery OTUs between the male and female networks at each of 15 microbiome sites, based on the *permuted network strategy* with 1000 times of re-sampling\*

| Sample Sites |                              | Core |         |         |         | Periphery |         |         |         |
|--------------|------------------------------|------|---------|---------|---------|-----------|---------|---------|---------|
|              |                              | O    | P       | O/P (%) | p-value | O         | P       | O/P (%) | p-value |
| Airways      | Anterior nares               | 118  | 188.23  | 62.69   | <0.001  | 97        | 165.546 | 58.59   | <0.001  |
| Gut          | Stool                        | 217  | 332.213 | 65.32   | <0.001  | 185       | 341.658 | 54.15   | <0.001  |
| Oral         | Attached Keratinized gingiva | 153  | 208.824 | 73.27   | <0.001  | 142       | 223.604 | 63.51   | <0.001  |
|              | Buccal mucosa                | 156  | 230.581 | 67.66   | <0.001  | 130       | 213.952 | 60.76   | <0.001  |
|              | Hard palate                  | 153  | 222.293 | 68.83   | <0.001  | 113       | 202.77  | 55.73   | <0.001  |
|              | Palatine Tonsils             | 197  | 303.828 | 64.84   | <0.001  | 176       | 283.564 | 62.07   | <0.001  |
|              | Saliva                       | 153  | 229.019 | 66.81   | <0.001  | 144       | 217.786 | 66.12   | <0.001  |

|      |                             |     |         |       |        |     |         |       |        |
|------|-----------------------------|-----|---------|-------|--------|-----|---------|-------|--------|
|      | Subgingival plaque          | 240 | 354.478 | 67.71 | <0.001 | 201 | 338.354 | 59.41 | <0.001 |
|      | Supragingival plaque        | 243 | 335.239 | 72.49 | <0.001 | 202 | 313.34  | 64.47 | <0.001 |
|      | Throat                      | 162 | 251.126 | 64.51 | <0.001 | 151 | 241.808 | 62.45 | <0.001 |
|      | Tongue dorsum               | 210 | 301.634 | 69.62 | <0.001 | 208 | 289.767 | 71.78 | <0.001 |
| Skin | Left Antecubital fossa      | 46  | 138.182 | 33.29 | <0.001 | 41  | 136.279 | 30.09 | <0.001 |
|      | Right Antecubital fossa     | 58  | 132.22  | 43.87 | <0.001 | 52  | 122.119 | 42.58 | <0.001 |
|      | Left Retroauricular crease  | 130 | 219.416 | 59.25 | <0.001 | 127 | 207.308 | 61.26 | <0.001 |
|      | Right Retroauricular crease | 143 | 217.882 | 65.63 | <0.001 | 105 | 204.13  | 51.44 | <0.001 |

\*O: the Observed shared core or periphery nodes; P: the Expected (predicted) shared core or periphery nodes.

**Table S6-3.** The  $p$ -values of permutation tests for the differences in core/periphery network (CPN) properties between the male and female with 1000 sets of permuted CPNs ( $p$ -value<0.05, indicating significant difference)

| Microbiome Site |                              | $r$   | % of Core | B11   | B12 (21) | B22   | Nestedness (S) |
|-----------------|------------------------------|-------|-----------|-------|----------|-------|----------------|
| Airways         | Anterior nares               | 0.000 | 1.000     | 0.000 | 1.000    | 1.000 | 1.000          |
| Gut             | Stool                        | 0.000 | 1.000     | 0.000 | 0.000    | 0.000 | 0.000          |
| Oral            | Attached Keratinized gingiva | 0.000 | 0.000     | 0.000 | 1.000    | 1.000 | 0.000          |
|                 | Buccal mucosa                | 0.000 | 1.000     | 0.000 | 0.000    | 0.000 | 0.000          |
|                 | Hard palate                  | 1.000 | 1.000     | 1.000 | 1.000    | 1.000 | 1.000          |
|                 | Palatine Tonsils             | 0.000 | 1.000     | 0.000 | 0.000    | 0.000 | 0.000          |
|                 | Saliva                       | 0.000 | 0.000     | 0.000 | 0.000    | 0.000 | 0.000          |
|                 | Subgingival plaque           | 1.000 | 1.000     | 1.000 | 1.000    | 1.000 | 0.000          |
|                 | Supragingival plaque         | 0.000 | 0.000     | 1.000 | 1.000    | 1.000 | 1.000          |
|                 | Throat                       | 0.000 | 1.000     | 1.000 | 1.000    | 1.000 | 0.000          |
|                 | Tongue dorsum                | 0.000 | 0.000     | 0.000 | 0.000    | 0.000 | 0.000          |
| Skin            | Left Antecubital fossa       | 1.000 | 0.000     | 1.000 | 1.000    | 1.000 | 1.000          |
|                 | Right Antecubital fossa      | 0.000 | 0.000     | 0.000 | 0.000    | 0.000 | 1.000          |
|                 | Left Retroauricular crease   | 1.000 | 1.000     | 1.000 | 0.000    | 0.000 | 0.000          |
|                 | Right Retroauricular crease  | 0.000 | 1.000     | 0.000 | 1.000    | 1.000 | 1.000          |

**Table S6-4.** The shared and sex-specific core-OTUs between the male and female CPN networks at each of the 15 microbiome sites (*This table was listed in Excel File: Microgenderome-OSI-File-C.xlsx*)

**Table S6-5.** The shared and sex-specific periphery-OTUs between the male and female CPN networks at each of the 15 microbiome sites (*This table was listed in Excel File: Microgenderome-OSI-File-C.xlsx*)



## 7. Shared high-salience skeleton network (HSN) analysis between the male and female

**Table S7-1.** The results of permutation tests for the shared skeletons between the male and female HSN (high-salience skeleton networks) at each of the 15 microbiome sites (with 1000 sets of permuted HSNs)\*

| Sample Sites |                              | $s > 0$ |           |                 | $s \geq 0.25$ |         |                 | $s \geq 0.5$ |        |                 |
|--------------|------------------------------|---------|-----------|-----------------|---------------|---------|-----------------|--------------|--------|-----------------|
|              |                              | O       | P         | <i>p</i> -value | O             | P       | <i>p</i> -value | O            | P      | <i>p</i> -value |
| Airway       | Anterior nares               | 6922    | 5887.495  | 0.881           | 23            | 49.093  | <0.001          | 2            | 13.457 | <0.001          |
| Gut          | Stool                        | 5572    | 9197.386  | <0.001          | 135           | 181.947 | 0.001           | 23           | 27.362 | 0.243           |
| Oral         | Attached Keratinized gingiva | 3486    | 4603.718  | <0.001          | 65            | 105.512 | <0.001          | 12           | 18.329 | 0.079           |
|              | Buccal mucosa                | 1762    | 3013.315  | <0.001          | 109           | 141.56  | 0.011           | 22           | 26.982 | 0.198           |
|              | Hard palate                  | 3418    | 3551.444  | 0.335           | 80            | 128.384 | <0.001          | 12           | 28.503 | <0.001          |
|              | Palatine Tonsils             | 4018    | 5023.687  | 0.421           | 102           | 141.602 | <0.001          | 19           | 25.297 | 0.106           |
|              | Saliva                       | 4661    | 3564.192  | 0.737           | 79            | 146.907 | <0.001          | 14           | 38.901 | <0.001          |
|              | Subgingival plaque           | 10097   | 9981.557  | 0.561           | 143           | 205.041 | <0.001          | 29           | 41.822 | 0.029           |
|              | Supragingival plaque         | 3254    | 5663.946  | <0.001          | 162           | 187.265 | 0.056           | 40           | 41.813 | 0.429           |
|              | Throat                       | 2649    | 3673.576  | 0.429           | 82            | 132.299 | <0.001          | 16           | 28.824 | 0.003           |
|              | Tongue dorsum                | 5590    | 7211.521  | <0.001          | 79            | 87.592  | 0.212           | 11           | 13.696 | 0.266           |
| Skin         | Left Antecubital fossa       | 611     | 2795.747  | <0.001          | 18            | 32.178  | 0.007           | 3            | 7.372  | 0.061           |
|              | Right Antecubital fossa      | 1379    | 3540.057  | <0.001          | 10            | 25.99   | 0.002           | 1            | 9.702  | <0.001          |
|              | Left Retroauricular crease   | 10940   | 14564.573 | <0.001          | 15            | 25.452  | 0.028           | 2            | 3.131  | 0.404           |
|              | Right Retroauricular crease  | 9012    | 15547.731 | <0.001          | 11            | 22.176  | 0.017           | 3            | 4.296  | 0.382           |

\*O: Observed shared skeletons; P: Expected (Predicted) shared skeletons; *s*: Salience value.

**Table S7-2.** The *p*-values from permutation tests for the differences in the HSN (high salience skeleton network) properties between the male and female with 1000 sets of permuted HSNs (*p*-value<0.05, indicating significant difference)

| Sample Sites |                              | Links (%) | Max   | Skewness | Kurtosis | $r_{HSS}$ |
|--------------|------------------------------|-----------|-------|----------|----------|-----------|
| Airway       | Anterior nares               | 0.000     | 0.000 | 0.000    | 0.000    | 0.000     |
| Gut          | Stool                        | 0.000     | 0.000 | 0.000    | 0.000    | 0.000     |
| Oral         | Attached Keratinized gingiva | 0.000     | 0.000 | 0.000    | 0.000    | 0.000     |
|              | Buccal mucosa                | 0.000     | 0.000 | 0.000    | 0.000    | 0.000     |
|              | Hard palate                  | 0.000     | 0.000 | 0.000    | 0.000    | 0.000     |
|              | Palatine Tonsils             | 0.000     | 0.000 | 0.000    | 0.000    | 0.000     |
|              | Saliva                       | 0.000     | 0.000 | 0.000    | 0.000    | 0.000     |
|              | Subgingival plaque           | 0.000     | 0.000 | 1.000    | 0.000    | 0.000     |
|              | Supragingival plaque         | 0.000     | 0.000 | 0.000    | 0.000    | 0.000     |
|              | Throat                       | 0.000     | 0.000 | 0.000    | 0.000    | 0.000     |
|              | Tongue dorsum                | 0.000     | 0.000 | 0.000    | 0.000    | 0.000     |
| Skin         | Left Antecubital fossa       | 0.000     | 0.000 | 0.000    | 0.000    | 0.000     |
|              | Right Antecubital fossa      | 0.000     | 0.000 | 0.000    | 0.000    | 0.000     |
|              | Left Retroauricular crease   | 0.000     | 0.000 | 0.000    | 0.000    | 0.000     |
|              | Right Retroauricular crease  | 0.000     | 0.000 | 0.000    | 0.000    | 0.000     |
